## HER2-low and HER2-zero in breast cancer between prognosis, prediction and entity

Marcus Schmidt, Hans-Anton Lehr and Katrin Almstedt

HER2 is a well-established prognostic and predictive factor in breast cancer, which is associated with a poor prognosis but also offers the chance of improved survival when treated with targeted therapies based on the monoclonal antibody trastuzumab [1], both in advanced (hazard ratio (HR) 0.82, 95% confidence interval (CI) 0.71 to 0.94,  $P = 0.004$ ) and in early (HR 0.66, 95% CI 0.57 to 0.77,  $P < 0.00001$ ) stages [2, 3]. The American Society of Clinical Oncology (ASCO)/College of American Pathologists (CAP) defines HER2-positivity as either 3+ by immunohistochemistry (IHC) or 2+ with amplification by *in situ* hybridization (ISH) [4]. Yet, the vast majority of breast tumors are considered HER2-negative (IHC 0 or 1+ or 2+ without amplification) by these criteria, and it has until recently been accepted that HER2-negative tumors do not benefit from trastuzumab-based therapy [5].

Now, results of randomized trials with trastuzumab-based antibody-drug conjugates (ADCs) such as trastuzumab deruxtecan (T-DXd) have fundamentally challenged this long-held view. They found that not only outright HER2-positive tumors, but also advanced breast cancers with low HER2 expression (1+ or 2+ ISH-negative) respond to T-DXd [6, 7]. Interestingly, T-DXd was investigated in a randomized phase 2 study (DAISY) not only in advanced HER2-positive and HER2-low breast carcinomas, but also in carcinomas without any HER2 expression [8]. The confirmed objective response rate (ORR) was positively associated with HER2 expression: HER2-positive 70.6%, HER2-low 37.5%, HER2-zero 29.7%. The authors concluded that although HER2 expression is a decisive factor for the efficacy of T-DXd, other mechanisms may also play a role.

Beside the role of HER2 as a predictive factor for treatment with trastuzumab or T-DXd, its prognostic impact has also been reevaluated. The prognostic and predictive significance of HER2-low and HER2-zero was investigated by Denkert and colleagues in 2310 patients with HER2-non-amplified primary breast cancers who were treated with neoadjuvant cytotoxic chemotherapy [9]. They showed that HER2-low was significantly more common in hormone receptor(HR)-positive than in HR-negative tumors (64.0% vs. 36.7%,  $P < 0.0001$ ) and that HER2-low tumors had a significantly lower rate of pathological complete response (pCR) compared to HER2-zero in HR-positive tumors (17.5 vs. 23.6%,

$P = 0.024$ ). No such difference was found in HR-positive breast cancers. The 3-year overall survival (OS) in HER2-low tumors compared to HER2-zero tumors was 91.6% vs. 85.8%,  $P = 0.0016$ . Interestingly, the OS of HER2-low tumors was significantly better only in HR-negative tumors (90.2% vs. 84.3%,  $P = 0.016$ ), but not in HER2-positive breast cancers. Based on these results, the authors proposed HER2-low as a new subgroup of breast cancers. Obviously, the reproducible classification as HER2-low has an important predictive effect for ADCs such as T-DXd.

The detection of a prognostic impact of a HER2-low status prompted us to test the prognostic significance of HER2-low and HER2-zero in a historic cohort of 410 consecutive node-negative breast cancer patients who had not received any adjuvant systemic therapy, with a median follow-up of more than 15 years [10]. The majority of HER2-negative patients were classified as HER2-low (56.4%). In this untreated population, HER2-low patients had significantly longer disease-free survival (DFS) (67.5% vs. 47.3%,  $P < 0.001$ ) and OS (75.4% vs. 66.8%,  $P = 0.009$ ) than HER2-zero patients. The results of the multivariable analysis confirmed the independent prognostic significance of HER2 status (DFS: HR 0.556, 95% CI 0.409–0.755,  $P < 0.001$ ; OS: HR 0.664, 95% CI 0.467–0.945,  $P = 0.023$ ). In agreement with Denkert and colleagues, our results suggest that hitherto HER2-negative patients should be differentiated in HER2-low and HER2-zero.

However, the distinct prognostic significance and the proposed description of HER2-low as a new entity have not gone unchallenged by other groups. For instance, Pfeiffer and coworkers reported a large retrospective cohort study on 1136.016 breast cancer patients using the National Cancer Database [11]. In the total population, HER2-low tumors had a lower pCR than HER2-zero tumors (OR 0.89, 95% CI 0.86–0.92,  $P < 0.001$ ). HER2-low tumors had only a slightly better OS (HR 0.98, 95% CI 0.97–0.99,  $P < 0.001$ ) than HER2-zero tumors. The authors concluded that these results do not support the classification of HER2-low breast cancer as a unique disease entity. Also, based on reads from a large prospective cohort study that included 5,235 early-stage breast cancer cases, Tarantino and colleagues argued against HER2-low breast cancer as a distinct biological subtype [12]. They reported a significantly higher pCR to cytotoxic chemotherapy in HER2-zero tumors compared

**Table 1: Systematic reviews and metaanalysis of the prognostic impact of HER2-low vs. HER2-zero in early breast cancer**

| Author                      | Studies (N) | Patients (N)      | DFS HR (95% CI)  | OS HR (95% CI)   |
|-----------------------------|-------------|-------------------|------------------|------------------|
| Ergun et al., 2023 [13]     | 23          | 636,535           | 0.87 (0.83–0.92) | 0.82 (0.74–0.91) |
| Tang et al., 2023 [17]      | 26          | 677,248           | 0.97 (0.92–1.02) | 0.90 (0.85–0.97) |
| Li et al., 2023 [14]        | 18          | 93,317            | 0.82 (0.73–0.93) | 0.87 (0.81–0.93) |
| Petrelli et al., 2023 [16]  | 25          | 34,965 (HER2-low) | 0.89 (0.84–0.94) | 0.83 (0.76–0.9)  |
| Molinelli et al., 2023 [15] | 42          | 1797,175          | 0.86 (0.79–0.92) | 0.90 (0.85–0.95) |

Abbreviations: CI: confidence interval; DFS: disease-free survival; HR: hazard ratio; N: number; OS: overall survival.

to HER2-low (OR 1.84, 95% CI 1.27–2.70,  $P = 0.002$ ), but, when the multivariable analyses were adjusted for confounding factors such as HR status, neither pCR nor survival retained their independent significance.

Several recently published systematic reviews and meta-analyses investigated the prognostic significance of HER2-low compared to HER2-zero in early breast cancer (Table 1) [13–17]. A HER2-low status was associated with a better OS in all but one meta-analysis. That analysis found no significant association between HER2-low and DFS in the overall population but only in the HR-positive subgroup (HR 0.96, 95% CI 0.94–0.99,  $P = 0.003$ ) [17]. In fact, others have confirmed that the association of a HER2-low status with survival is strongest in HR-positive carcinomas [15]. Based on these results, Molinelli and coworkers concluded that HER2-low breast cancer cannot be considered a new biological entity and that its different prognostic characteristics are likely due to HR status [15].

In a most recently published prospective cohort study that was not yet included in the systematic reviews and meta-analyses described above, HER2-low had a positive impact on survival also in HR-negative patients (HR 0.54, 95% CI 0.33–0.91,  $P = 0.02$ ) irrespective of other key covariates (HR 0.48, 95% CI 0.27–0.83,  $P = 0.009$ ) [18]. The authors concluded that these findings raised the possibility that HER2-low breast cancer may be a unique entity.

Could it be that the problems with the HER2-low status might reside in its low diagnostic reproducibility? Fernandez and coworkers found only 26% concordance between 0 and 1+, compared to 58% concordance between 2+ and 3+ [19]. A recent update to the ASCO/CAP guidelines for HER2 testing in breast cancer noted that the distinction between IHC 0 and 1+ is now clinically relevant, but that it is premature to create new outcome categories for HER2 expression (e.g., HER2-low, HER2-ultra-low) [20].

In summary, we found an independent positive prognostic effect of HER2-low compared to HER2-zero in early breast cancer. This result has been confirmed in several other studies and at the meta-analysis level. However, based on the currently available study results, it

can not yet be conclusively determined whether HER2-low can be considered a separate diagnostic entity. However, the fact that early randomized trials find that HER2-zero tumors may also benefit from trastuzumab-deruxtecan, the question of a distinct HER2-low entity may soon become obsolete.

## AUTHOR CONTRIBUTIONS

M. Schmidt: Conceptualization, Writing - Original Draft, Writing - Review and Editing. Hans-Anton Lehr: Writing - Review and Editing. Katrin Almstedt: Writing - Review and Editing.

## CONFLICTS OF INTEREST

M. Schmidt reports personal fees from AstraZeneca, BioNTech, Daiichi Sankyo, Eisai, Gilead, Lilly, MSD, Novartis, Pantarhei Bioscience, Pfizer, Roche, and SeaGen outside the submitted work. Institutional research funding from AstraZeneca, BioNTech, Eisai, Genentech, German Breast Group, Novartis, Palleos, Pantarhei Bioscience, Pierre Fabre, and SeaGen. In addition, Marcus Schmidt has a patent for EP 2390370 B1 issued and a patent for EP 2951317 B1 issued. H-A. Lehr declares that he has no conflict of interest. K. Almstedt received speaker honoraria from Roche Pharma AG, Pfizer Pharma GmbH and AstraZeneca.

## FUNDING

No funding was used for this paper.

**Marcus Schmidt:** Department of Obstetrics and Gynecology, University Medical Center of the Johannes Gutenberg-University, Mainz 55131, Germany

**Correspondence to:** Marcus Schmidt,  
**email:** marcus.schmidt@unimedizin-mainz.de

**Keywords:** breast cancer; HER2; HER2-low; prognostic; predictive

**Received:** May 29, 2024

**Published:** June 20, 2024

## REFERENCES

1. Ross JS, et al. *Oncologist*. 1998; 3:237–52. [PubMed]
2. Balduzzi S, et al. *Cochrane Database Syst Rev*. 2014; 2014:CD006242. <https://doi.org/10.1002/14651858.CD006242.pub2>. [PubMed]
3. Moja L, et al. *Cochrane Database Syst Rev*. 2012; 2012:CD006243. <https://doi.org/10.1002/14651858.CD006243.pub2>. [PubMed]
4. Wolff AC, et al. *J Clin Oncol*. 2018; 36:2105–22. <https://doi.org/10.1200/JCO.2018.77.8738>. [PubMed]
5. Fehrenbacher L, et al. *J Clin Oncol*. 2020; 38:444–53. <https://doi.org/10.1200/JCO.19.01455>. [PubMed]
6. Cortés J, et al. *N Engl J Med*. 2022; 386:1143–54. <https://doi.org/10.1056/NEJMoa2115022>. [PubMed]
7. Modi S, et al. *N Engl J Med*. 2022; 387:9–20. <https://doi.org/10.1056/NEJMoa2203690>. [PubMed]
8. Mosele F, et al. *Nat Med*. 2023; 29:2110–20. <https://doi.org/10.1038/s41591-023-02478-2>. [PubMed]
9. Denkert C, et al. *Lancet Oncol*. 2021; 22:1151–61. [https://doi.org/10.1016/S1470-2045\(21\)00301-6](https://doi.org/10.1016/S1470-2045(21)00301-6). [PubMed]
10. Almstedt K, et al. *Eur J Cancer*. 2022; 173:10–19. <https://doi.org/10.1016/j.ejca.2022.06.012>. [PubMed]
11. Peiffer DS, et al. *JAMA Oncol*. 2023; 9:500–10. <https://doi.org/10.1001/jamaoncol.2022.7476>. [PubMed]
12. Tarantino P, et al. *JAMA Oncol*. 2022; 8:1177–83. <https://doi.org/10.1001/jamaoncol.2022.2286>. [PubMed]
13. Ergun Y, et al. *Cancer Treat Rev*. 2023; 115:102538. <https://doi.org/10.1016/j.ctrv.2023.102538>. [PubMed]
14. Li C, et al. *Breast Cancer*. 2023; 30:965–75. <https://doi.org/10.1007/s12282-023-01487-w>. [PubMed]
15. Molinelli C, et al. *ESMO Open*. 2023; 8:101592. <https://doi.org/10.1016/j.esmoop.2023.101592>. [PubMed]
16. Petrelli F, et al. *Anticancer Res*. 2023; 43:4303–13. <https://doi.org/10.21873/anticancer.16625>. [PubMed]
17. Tang Y, et al. *Ther Adv Med Oncol*. 2023; 15:17588359231156669. <https://doi.org/10.1177/17588359231156669>. [PubMed]
18. Khoury T, et al. *JAMA Netw Open*. 2024; 7:e243345. <https://doi.org/10.1001/jamanetworkopen.2024.3345>. [PubMed]
19. Fernandez AI, et al. *JAMA Oncol*. 2022; 8:1–4. <https://doi.org/10.1001/jamaoncol.2021.7239>. [PubMed]
20. Wolff AC, et al. *J Clin Oncol*. 2023; 41:3867–72. <https://doi.org/10.1200/JCO.22.02864>. [PubMed]

**Copyright:** © 2024 Schmidt et al. This is an open access article distributed under the terms of the [Creative Commons Attribution License](https://creativecommons.org/licenses/by/4.0/) (CC BY 4.0), which permits unrestricted use, distribution, and reproduction in any medium, provided the original author and source are credited.
